# Supplementary material for: Enhanced amplified spontaneous emission from morphology-controlled organic–inorganic halide perovskite films
Source: Royal Society of Chemistry journal article supplement (doi:10.1039/c5ra20167e), 2015-01-01
Supplement: c5ra20167e1.pdf [file c5ra20167e1.pdf]

## Supplementary Information

**Enhanced amplified spontaneous emission from morphology-controlled organic-inorganic halide  
perovskite films**

**Liang Qin,<sup>a</sup> Longfeng Lv,<sup>a</sup> Yu Ning,<sup>a</sup> Chunhai Li,<sup>a</sup> Qipeng Lu,<sup>a</sup> Lijie Zhu,<sup>a</sup> Yufeng Hu,<sup>a</sup> Zhidong  
Lou,<sup>a</sup> Feng Teng<sup>a</sup> and Yanbing Hou<sup>\*a</sup>**

Key laboratory of Luminescence and Optical Information, Ministry of Education, Beijing JiaoTong University, Beijing 100044,

China. E-mail: ybhou@bjtu.edu.cn

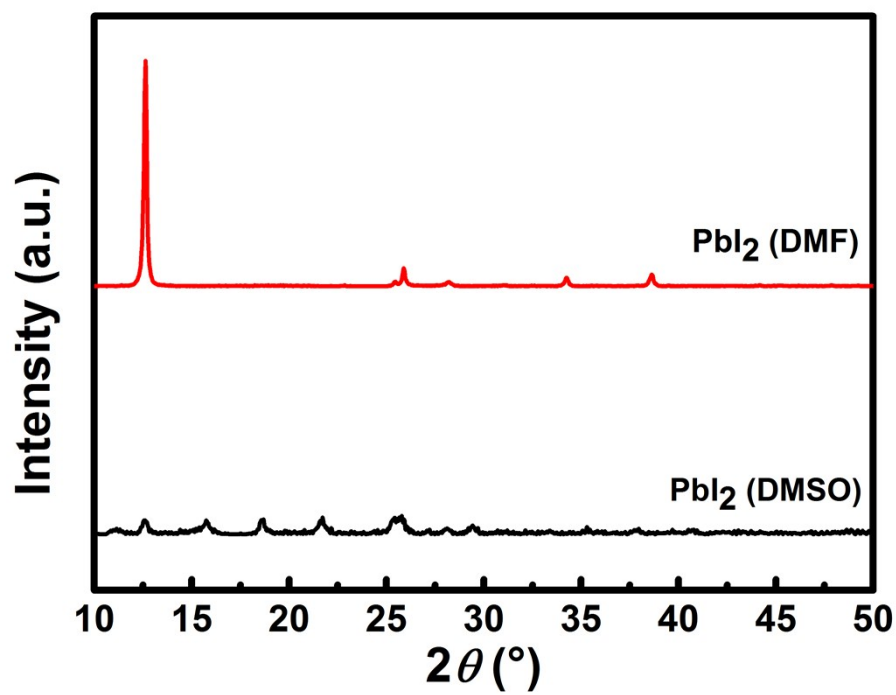

Fig. S1. XRD patterns of DMF and DMSO based PbI<sub>2</sub> films.

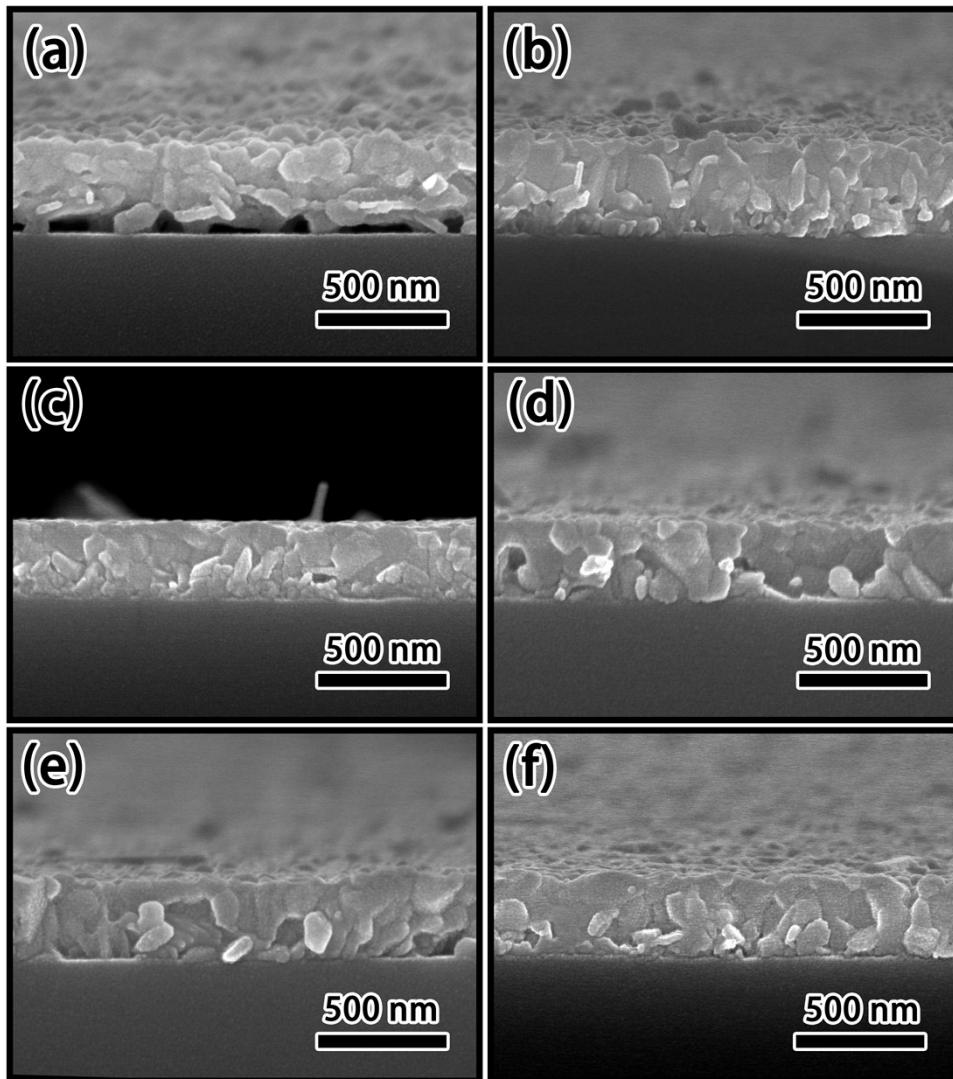

Fig. S2. Cross-sectional SEM images of perovskite films converted from the PbI<sub>2</sub> films spin coated from the binary solvent (DMF:DMSO) solutions in 10:0 (a), 8:2 (b), 6:4 (c), 4:6 (d), 2:8 (e), and 0:10 (f) ratios.

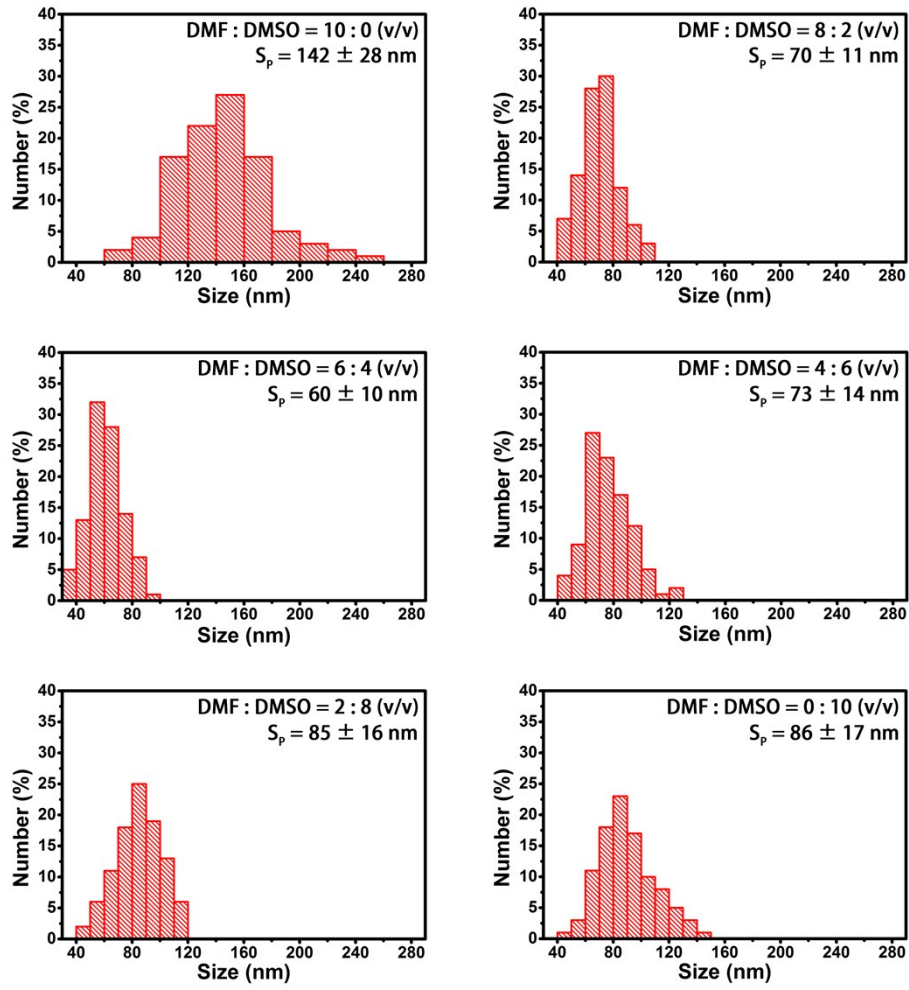

Fig. S3. Histogram of average particle size ( $S_p$ ) for each perovskite thin film from the SEM images.

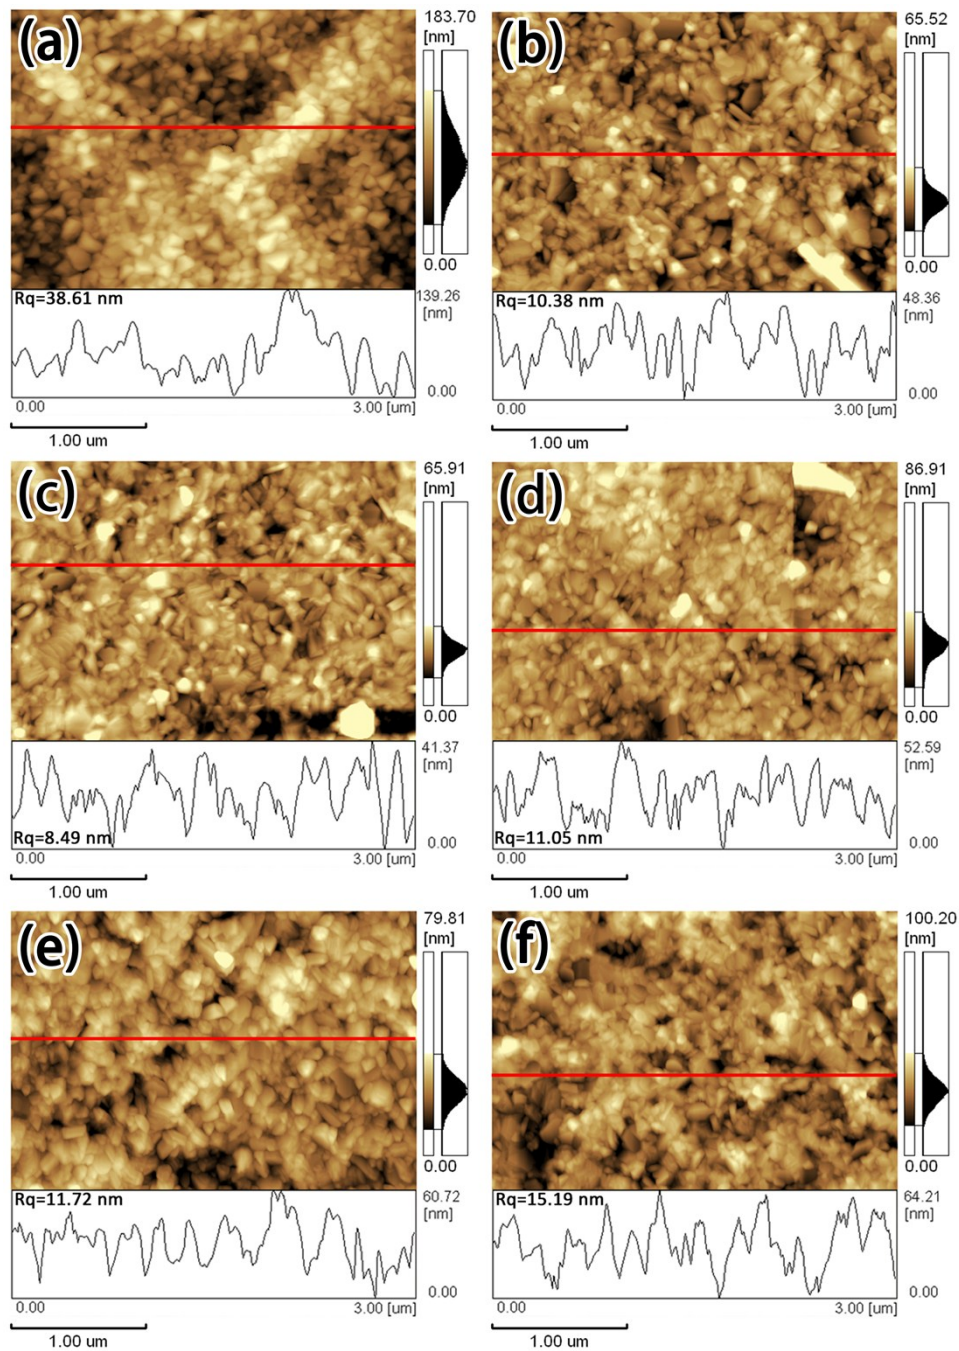

Fig. S4. AFM images of perovskite films converted from the  $\text{PbI}_2$  films spin coated from the binary solvent (DMF:DMSO) solutions in 10:0 (a), 8:2 (b), 6:4 (c), 4:6 (d), 2:8 (e), and 0:10 (f) ratios. The

bottom curve is the roughness profile along the corresponding red line in each figure.

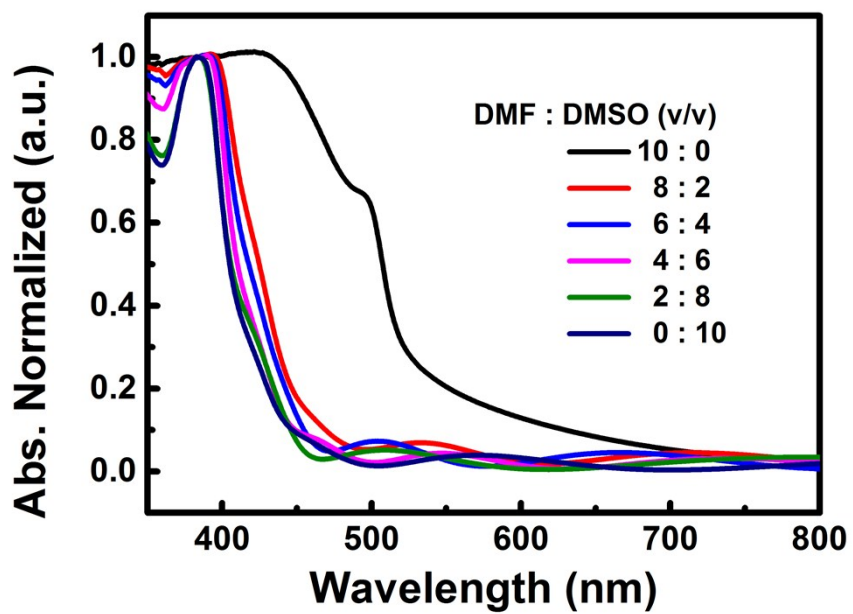

Fig. S5. UV-vis absorption spectra of PbI<sub>2</sub> films fabricated from DMF:DMSO binary solution in 10:0,

8:2, 6:4, 4:6, 2:8, and 0:10 ratios (v/v).

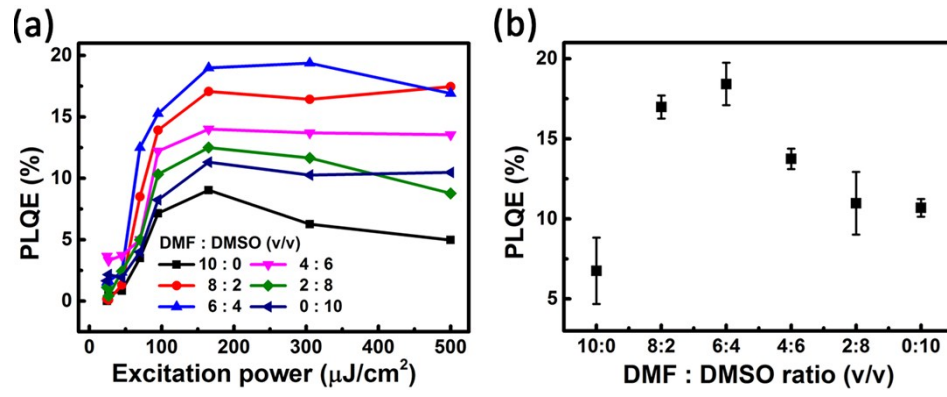

Fig. S6. PLQE of MAPbI<sub>3</sub> perovskite films based on PbI<sub>2</sub> (solvent) layers which prepared by binary solvent in different ratio.
